# Supplementary material for: Congenic Strain Analysis Reveals Genes That Are Rapidly Evolving Components of a Prezygotic Isolation Mechanism Mediating Incipient Reinforcement
Source: PLoS One. 2012 Apr 25;7(4):e35898. doi: 10.1371/journal.pone.0035898 (PMC3338474; doi:10.1371/journal.pone.0035898)
Supplement: Table S1 — Gene information. (XLS) [file pone.0035898.s001.xls]

## Sheet: Sheet1
Table S1 Gene information
Gene	Accession	Chr	Strand	mm9 coordinates	Description
Fkrp	AJ511806	7	n	17,394,616-17,402,081	fukutin-related protein
Calm3	NM_007590	7	n	17,500,728-17,509,463	Calmodulin
Ceacam14	NM_25957	7	p	18,397,982-18,401,012	Carcinoembryonic antigen-related cell adhesion molecule B1
Pglyrp1	NM_009402	7	p	19,470,039-19,475,787	Peptidoglycan recognition protein 1
Rsph6a	NM_031255	7	p	19,640,039-19,659,796	Radial spoke head 6 homolog (Chlamydomonas)
Snrpd2	AK_007389	7	p	19,735,071-19,738,084	Small nuclear ribonucleoprotein D2
Ckm	NM_007710	7	p	19,996,443-20,006,932	Creatinine kinase, muscle
Apoe	NM_009696	7	n	20,281,595-20,284,515	Apolipoprotein E
Plaur	NM_011113	7	p	25,247,519-25,260,892	urokinase plasminogen activator surface receptor
Ceacam10	NM_007675	7	p	25,562,223-25,569,668	Carcino-embryonic antigen-related cell adhesion molecule 10
Rps19	NM_023133	7	p	25,669,390-25,674,825	Ribosomal protein S19
Arhgef1	NM_008488	7	p	25,687,931-25,711,611	Rho guanine nucleotide exchange factor 1
Rabac1	AF_252856	7	n	25,754,769-25,757,747	Rab acceptor 1 (prenylated)
Cnfn	AK_008979	7	n	26,152,635-26,154,743)	Cornifelin
Cyp2a12	LO_6463	7	p	27,814,121-27,821,851	Cytochrome P450, 2a12
Cyp2f2	NM_007817	7	p	27,904,928-27,918,679	Cytochrome P450, 2f2
Pld3	NM_011116	7	n	28,317,023-28,338,186	Phospholipase D family, member 3
Dll3	NM_007866	7	n	29,078,572-29,087,257	Delta-like 3 (Drosophila)
Lrfn1	NM_030562	7	p	29,237,257-29,252,567	Leucine rich repeat and fibronectin type III domain containing 1
Aplp1	L04538	7	n	31,220,001-31,230,580	amyloid-like protein 1
Psenen	NM_025498	7	n	31,346,887-31,348,203	Presenilin enhancer 2 homolog (C. elegans)
Zbtb32	NM_021397	7	n	31,374,700-31,383,928	Zinc finger and BTB domain containing 32
Upk1a	AK_004014	7	n	31,388,111-31,397,753	Uroplakin 1A
Cox6b1	NM_025628	7	n	31,401,993-31,411,170	Cytochrome c oxidase, subunit 6b polypeptide 1
Tmem147	AK_010168	7	n	31,512,720-31,514,553	Transmembrane protein 147
Cd22	NM_009845	7	n	31,650,423-31,665,361	CD22 antigen
Hamp	NM_032541	7	n	31,727,390-31,729,036	Hepcidin antimicrobial peptide
Abpa2	GU269233	7	n	32,075,543-32,076,939	Androgen-binding protein alpha subunit 2 (aka Abph)
Abpa21p	GU269230	7	p	33,236,016- 33,237,438	Androgen-binding protein alpha subunit 21 pseudogene
Abpa24	GU269232	7	p	33,452,441-33,453,859	Androgen-binding protein alpha subunit 24
Abpbg26	AY325898	7	n	34728065-34730103	Androgen-binding protein beta-gamma subunit 26
Abpa26	GU269229	7	p	34743704-34745121	Androgen-binding protein alpha subunit 26 pseudogene
Abpbg27	AY325897	7	n	34796983-34799005	Androgen-binding protein beta-gamma subunit 27
Abpa27	AF144714	7	p	34806467-34807888	Androgen-binding protein alpha subunit 27
Abpa30	Gm12776	7	p	34884647-34885844	Androgen-binding protein alpha subunit 30 pseudogene
Uba2	NM_016682	7	n	34,925,708-34,954,618	Ubiquitin-like modifier activating enzyme 2
Lrp3	BC094349	7	n	35985953-36000364	Low density lipoprotein receptor-related protein
Ccne1	NM_007633	7	n	38883003-38892509	G1/S-specific cyclin-E1
Siglece	NM_031181	7	n	50906440-50915531	sialic acid-binding Ig-like lectin 12
