# Supplementary material for: Congenic Strain Analysis Reveals Genes That Are Rapidly Evolving Components of a Prezygotic Isolation Mechanism Mediating Incipient Reinforcement
Source: PLoS One. 2012 Apr 25;7(4):e35898. doi: 10.1371/journal.pone.0035898 (PMC3338474; doi:10.1371/journal.pone.0035898)
Supplement: Table S2 — Sequence gaps (regions with low/no SNP density in the Mouse Diversity array and lacking UCSC genes). (XLS) [file pone.0035898.s002.xls]

## Sheet: Sheet1
Table S2. Sequence gaps (regions with low/no SNP density in the Mouse Diversity array and lacking UCSC genes).
	Adapted from Suppl Table 5 (Yang et al. 2011). Note that we reduced their dataset to only chromosome 7 regions transferred from
	DBA onto the C3H background in producing the b-congenic strain, and further reduced those by graying out those outside the segment.
	Genes with ESTs between the gaps are shown (see Table S1)
Chr	Start	End	Size	Genes from the current study
7	3005336	3796246	790910
7	7200974	10593801	3392827
7	11418742	12041428	622686
7	15240532	16173489	932957
				Calm3,
7	17840762	18181257	340495	(gap)
				Ceacam14, Pglyrp1, Rsph6a, Sndrpd2, Ckm, Apoe
7	20658198	24074680	3416482	(gap)
				Rps19, Arhgef1, Rabac1, Cnfn, Cyp2a12, Cyp2f2
				Pld3, Dll3, Lrfn1, Pensen, Zbtb32, Upk1a, Cox6b1
				Tmem147, Cd22, Hamp, Abph (aka Abpa2)
7	32329412	33973476	1644064	Not actually a gap but rather contains 32 of 64 Abp
				genes; see Laukaitis et al. 2008.
				Uba2, Abpbg26, Abpbg27, Abpa27
7	39102616	46555960	7453344	(gap)
7	48768732	48994136	225404	(gap)
7	50355668	50516611	160943	(gap)
7	54844281	54976185	131904
7	66600125	67512311	912186
7	113103675	113378939	275264
