# Supplementary material for: Congenic Strain Analysis Reveals Genes That Are Rapidly Evolving Components of a Prezygotic Isolation Mechanism Mediating Incipient Reinforcement
Source: PLoS One. 2012 Apr 25;7(4):e35898. doi: 10.1371/journal.pone.0035898 (PMC3338474; doi:10.1371/journal.pone.0035898)
Supplement: Table S4 — Chromosome 7 encoded proteins found in mouse saliva proteomes [13] . (XLS) [file pone.0035898.s004.xls]

## Sheet: Sheet1
Table S4. Chromosome 7 encoded proteins found in mouse saliva proteomes (Karn and Laukaitis 2011)
					Chromosome 7		Region differs
IPI number	Description				coordinates		between strains	Notes
IPI00170392	Androgen binding protein beta-gamma 26				34728027-34730000		Yes	ESTs in submandibular and sub-
								lingual glands (Laukaitis et al. 2005)
IPI00153363	Androgen-binding protein beta-gamma 27				34796945-34798961		Yes	ESTs in all three salivary
								glands (Laukaitis et al. 2005)
IPI00127933	Androgen binding protein alpha 27				34806586-34807898		Yes	ESTs in all three salivary
								glands (Laukaitis et al. 2005)
IPI00112184	Putative uncharacterized protein (KLK1B8)				51200382-51201297		No	Beyond transferred segment
IPI00130801	Kallikrein 1-related peptidase b8				51206042-51210308		No	Beyond transferred segment
IPI00134580	Kallikrein 1-related peptidase b1				51222121-51226688		No	Beyond transferred segment
IPI00136040	Kallikrein 1-related peptidase b9				51231467-51235746		No	Beyond transferred segment
IPI00136034	Kallikrein 1-related peptidase b11				51251249-51255244		No	Beyond transferred segment
IPI00121818	Epidermal growth factor-				51260009-51272287		No
	binding protein tyoe B							Beyond transferred segment
IPI00121821	Kallikrein 1-related peptidase b26				51268048-51272331		No	Beyond transferred segment
IPI00124824	Kallikrein 1-related peptidase b27				51307660-51312075		No	Beyond transferred segment
IPI00124822	Kallikrein 1-related peptidase b21				51357662-51361944		No	Beyond transferred segment
IPI00136038	Kallikrein 1-related peptidase b22				51368049-51372289		No	Beyond transferred segment
IPI00113575	Kallikrein 1-related peptidase b16				51392137-51396974		No	Beyond transferred segment
IPI00124804	Kallikrein 1-related peptidase b24				51443643-51447816		No	Beyond transferred segment
IPI00134582	Kallikrein 1-related peptidase b3				51453561-51457721		No	Beyond transferred segment
IPI00316234	Kallikrein 1-related peptidase-like b4				51462782-51467075		No	Beyond transferred segment
IPI00136033	Kallikrein 1-related peptidase b5				51471829-51476082		No	Beyond transferred segment
IPI00323869	Kallikrein-1				51480820-51484987		No	Beyond transferred segment
IPI00309704	Nucleobindin 2				123,647,888-123,683,592		No	Beyond transferred segment
